# Supplementary material for: Detection of Leishmania spp. in Chronic Dermatitis: Retrospective Study in Exposed Horse Populations
Source: MDPI journal article supplement (doi:10.3390/pathogens11060634), 2022-05-31
Supplement: s1 [file s1]

**Supplementary Table S1.** Severity, pattern and distribution of the inflammatory infiltrate in the samples. Case ID. 18(\*) was the positive sample.

| Case Number (ID) | Severity      | Pattern        | Distribution |
|------------------|---------------|----------------|--------------|
| 1                | moderate      | nodular        | deep         |
| 2                | moderate      | interstitial   | deep         |
| 3                | mild          | perivascular   | superficial  |
| 4                | moderate      | interstitial   | deep         |
| 5                | moderate      | interstitial   | mid          |
| 6                | moderate      | interstitial   | mid          |
| 7                | moderate      | perivascular   | superficial  |
| 8                | severe        | nodular        | deep         |
| 9                | moderate      | nodular        | deep         |
| 10               | severe        | nodular        | deep         |
| 11               | mild          | perivascular   | superficial  |
| 12               | mild          | perivascular   | superficial  |
| 13               | severe        | nodular        | deep         |
| 14               | mild          | perivascular   | superficial  |
| 15               | moderate      | interstitial   | deep         |
| 16               | moderate      | interstitial   | mid          |
| 17               | moderate      | perivascular   | mid          |
| <b>18*</b>       | <b>severe</b> | <b>nodular</b> | <b>deep</b>  |
| 19               | mild          | perivascular   | mid          |
| 20               | mild          | perivascular   | deep         |
| 21               | moderate      | interstitial   | mid          |
| 22               | severe        | nodular        | superficial  |
| 23               | mild          | perivascular   | deep         |
| 24               | severe        | nodular        | deep         |
| 25               | mild          | perivascular   | superficial  |
| 26               | moderate      | nodular        | deep         |
| 27               | moderate      | nodular        | deep         |
| 28               | moderate      | interstitial   | deep         |
| 29               | severe        | interstitial   | superficial  |
| 30               | severe        | interstitial   | deep         |
| 31               | moderate      | nodular        | deep         |
| 32               | moderate      | interstitial   | deep         |
| 33               | severe        | nodular        | deep         |
| 34               | moderate      | perivascular   | mid          |
| 35               | mild          | perivascular   | superficial  |
| 36               | moderate      | interstitial   | deep         |
| 37               | moderate      | interstitial   | superficial  |
| 38               | moderate      | perivascular   | superficial  |
| 39               | moderate      | diffuse        | mid          |
| 40               | moderate      | nodular        | deep         |
| 41               | moderate      | interstitial   | mid          |
| 42               | severe        | diffuse        | deep         |
| 43               | mild          | perivascular   | superficial  |
| 44               | moderate      | interstitial   | deep         |
| 45               | severe        | diffuse        | deep         |
| 46               | moderate      | diffuse        | deep         |
| 47               | mild          | perivascular   | superficial  |
